# Supplementary material for: Energy storage and water splitting applications of self-grown Na2O–NiCl2 upright standing nanoplates: a process of 3D nickel surface modification using seawater
Source: Royal Society of Chemistry journal article supplement (doi:10.1039/d3dt01121f), 2023-01-01
Supplement: d3dt01121f1.pdf [file d3dt01121f1.pdf]

## Supporting Information

### Energy storage and water splitting applications of self-grown Na<sub>2</sub>O-NiCl<sub>2</sub> upright standing nanoplates: A process of 3D nickel surface modification using seawater

Sukhvinder kaur Sukhmani<sup>a</sup>, Rajaram S. Mane<sup>a\*</sup>, Tabassum Siddiqui<sup>a</sup>, Shoyebmohmad F. Shaikh<sup>b</sup>, Sajjad Hussain<sup>c</sup>

<sup>a</sup>School of Physical Sciences, Swami Ramanand Teerth Marathwada University, Nanded 431606, Maharashtra, India

<sup>b</sup>Department of Chemistry, College of Science, King Saud University, Riyadh, 11451, Saudi Arabia

---

#### Formulae used:

The specific capacitance (C), energy density (E) and power density (P) were calculated from the discharge time of GCD curves using the equation as following

*Specific capacitance,*

$$C = \frac{I \times \Delta t}{m \times \Delta V}$$

(1)

Where, I is the discharge current,  $\Delta t$  is the discharge time, m is the mass of the active material and  $\Delta V$  is the potential window.

The relation between energy density (E), power density (P) and specific capacitance (C<sub>v</sub>) are calculated by the following equations:

*Energy density,*

$$E = \frac{1}{2} C \Delta V^2 \tag{2}$$

*Power density,*

$$P = \frac{E}{\Delta t} \times 3600 \quad (3)$$

In above formulae, C is the specific capacitance of Na<sub>2</sub>O-NiCl<sub>2</sub>@NiF//Na<sub>2</sub>O-NiCl<sub>2</sub>@NiF device, ΔV is the potential window (V) and Δt is the discharging time.

Measured potentials vs. SCE were converted to a reverse hydrogen electrode (RHE) using the Nernst equation.

$$E_{RHE} = E_{Ag/AgCl} + 0.059 \times PH + E^0_{Ag/AgCl} \quad (4)$$

Where E<sub>RHE</sub> is the converted potential versus RHE, E<sup>0</sup><sub>Ag/AgCl</sub> = 0.197 at room temperature and E<sub>Ag/AgCl</sub> is the experimental calculated potential versus an Ag/AgCl as a reference electrode. The over potential (η) can be calculated using the following equation [S1].

$$\eta = E_{RHE} - 1.23 \quad (5)$$

Where η and E<sub>RHE</sub> are the over and converted potentials, respectively.

**Table S1:** A comparative analysis of morphology, synthesis method and the electrochemical energy storage performance by natural-eco-friendly aspects.

| Sr. no | Working electrode                                     | Synthesis method      | Use of Natural resource | Morphology           | Areal/Specific Capacitance (F.cm <sup>-2</sup> / F.g <sup>-1</sup> ) | Ref. |
|--------|-------------------------------------------------------|-----------------------|-------------------------|----------------------|----------------------------------------------------------------------|------|
| 1      | Carbon@NiF                                            | Spray-pyrolysis       | Coconut water           | Nanosheets           | 782.7 F/g                                                            | S2   |
| 2      | Ti <sub>3</sub> C <sub>3</sub> T <sub>x</sub> , MXene | HF-etching            | Sea water (electrolyte) | Nano-flakes          | 121.8 F/cm <sup>2</sup>                                              | S3   |
| 3      | Carbon                                                | Chemical activation   | Almond                  | Nano-sheets          | 228 F/g                                                              | S4   |
| 4      | Porous Carbon                                         | Annealing and drying  | Soyabean milk           | Porous nanoparticles | 118 F/g                                                              | S5   |
| 5      | Fe <sub>2</sub> O <sub>3</sub>                        | Electro-deposition    | Sea water (electrolyte) | Nanosheets           | 259.5 C/g                                                            | S6   |
| 6      | Hard carbon (Cathode)                                 | Electro-chemical cell | Sea water (Anode)       | Hard nano-particles  | -                                                                    | S7   |

|   |                                          |              |                            |                      |          |                 |
|---|------------------------------------------|--------------|----------------------------|----------------------|----------|-----------------|
| 7 | Carbon                                   | Pyrolysis    | Orange peel<br>(Precursor) | Hollow<br>Structured | 407 F/g  | S8              |
| 8 | $\text{Na}_2\text{O-NiCl}_2@/\text{NiF}$ | Hydrothermal | Sea water<br>(Precursor)   | Nano-plates          | 2533 F/g | Present<br>work |

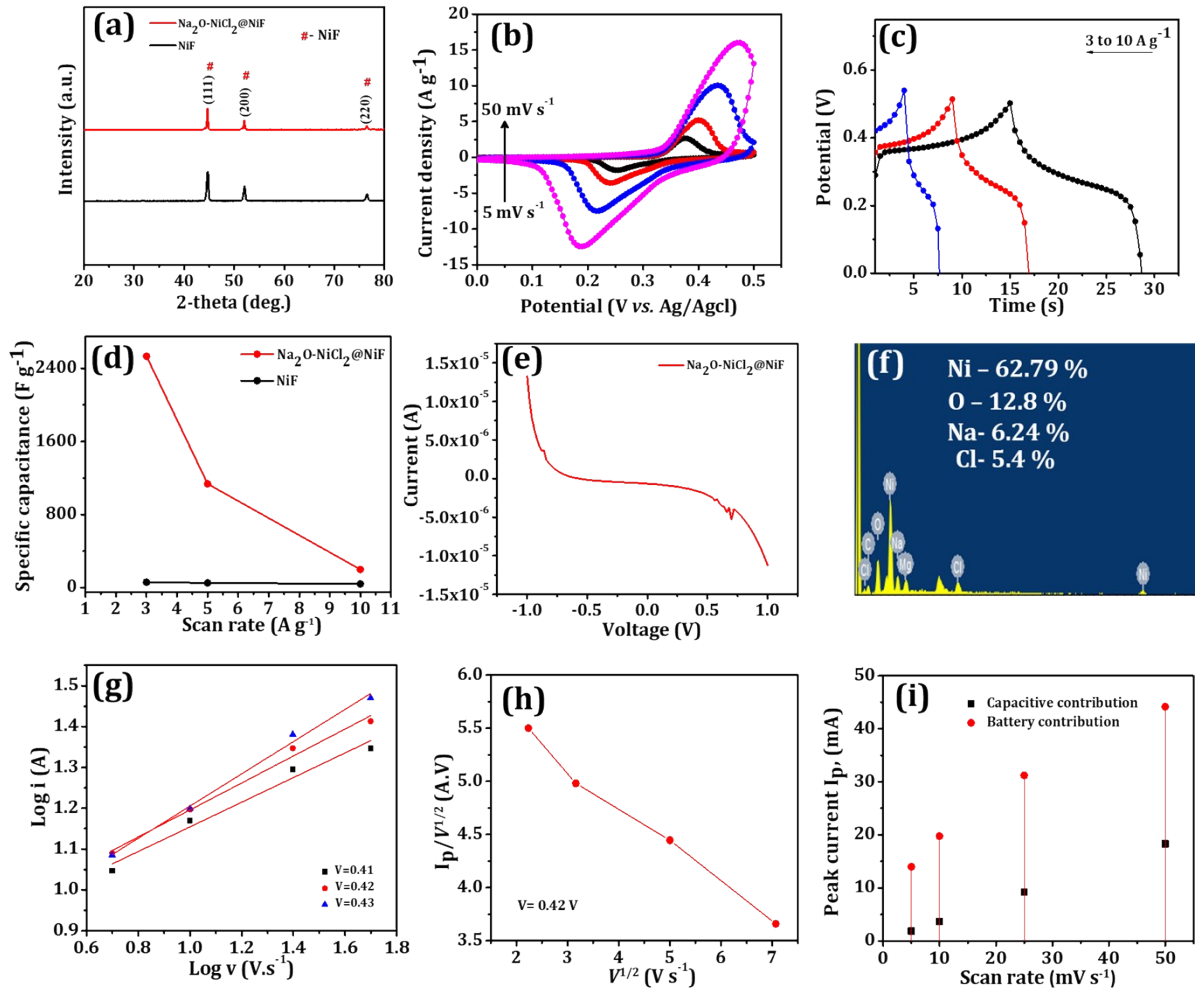

**Figure S1:** (a) XRD analysis (With bare NiF), (b) CV and (b) GCD curve of bare NiF, (d) Specific capacitance vs. scan rate plot, (e) Conductivity of sea water precursor (f) EDX elemental composition measurements  $\text{Na}_2\text{O-NiCl}_2@/\text{NiF}$ , (g)  $\log i$  vs.  $\log v$  plots were used for obtaining 'b', (h)  $i/v^{1/2}$  vs.  $v^{1/2}$  plots are used for estimating  $a_1$  and  $a_2$  (at 0.42 V), (i) capacitive and battery shares in overall performance.

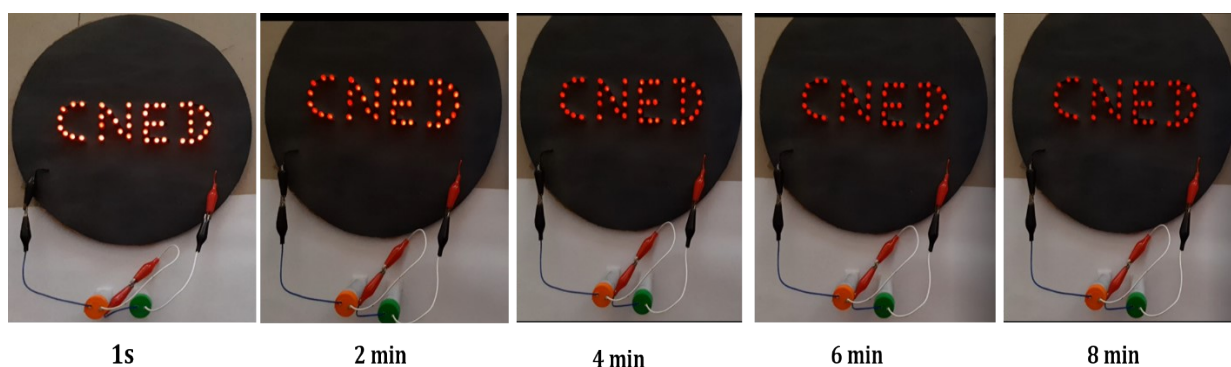

**Figure S2:** Digital photograph of  $\text{Na}_2\text{O-NiCl}_2@\text{NiF} // \text{Na}_2\text{O-NiCl}_2@\text{NiF}$  symmetric device practical demonstration.

### References

- [S1] W. Chen, H. Zhang, Z. Ma, S. Li, Z. Li, *J. Alloys Compd.*, 2018, **762**, 565–573.
- [S2] Y T. Nakate, U. T. Nakate, R.S. Mane, D. J. Shirale, *Coll. Surf. A: Phys. Engi. Asp.*, 2021, **626**, 127012
- [S3] Q. Xia, N. M. Shinde, T. Zhang, J. Yun, A. Zhou, R. S. Mane, S. Mathur, K. H. Kim, *Dalton Trans.*, 2018, 01375.
- [S4] F. Zeng, Z. Li, X. Li, J. Wang, Z. Kong, Y. Sun, Z. Liu, H Feng, *Appl. Surf. Sci.*, 2019, **467-468**, 229-235.
- [S5] L. Yang, J. Wang, S. Wang, X. Guan, X. Guan, G. Wang, *Springer*, 2019, **20**, 11589.
- [S6] P. Zhao, M. Yao, Q. Zhang, N. Wang, W. Hu, S. Komarneni, *Electrochimica Acta*, 2019, 318, 211-219.
- [S7] Y. Kim, J. Kim, C. Vaalma, G. Hyeong Bae, G. Kim, S. Passerini, Y. Kim, *J. Carbon*, 2017, **12**, 059.
- [S8] C. K. Ranaweera, P. K. Kahol, M. Ghimire, S. R. Mishra, R. Gupta, *J. Carbon*, 2017, **3**, 25.
